# Supplementary material
Source: Springer Nature journal article supplement (https://www.springermedizin.de/resource/supplementary/12943_2013_1333_MOESM7_ESM.pdf/9552728)
Supplement: MOESM7 [file 9552728]

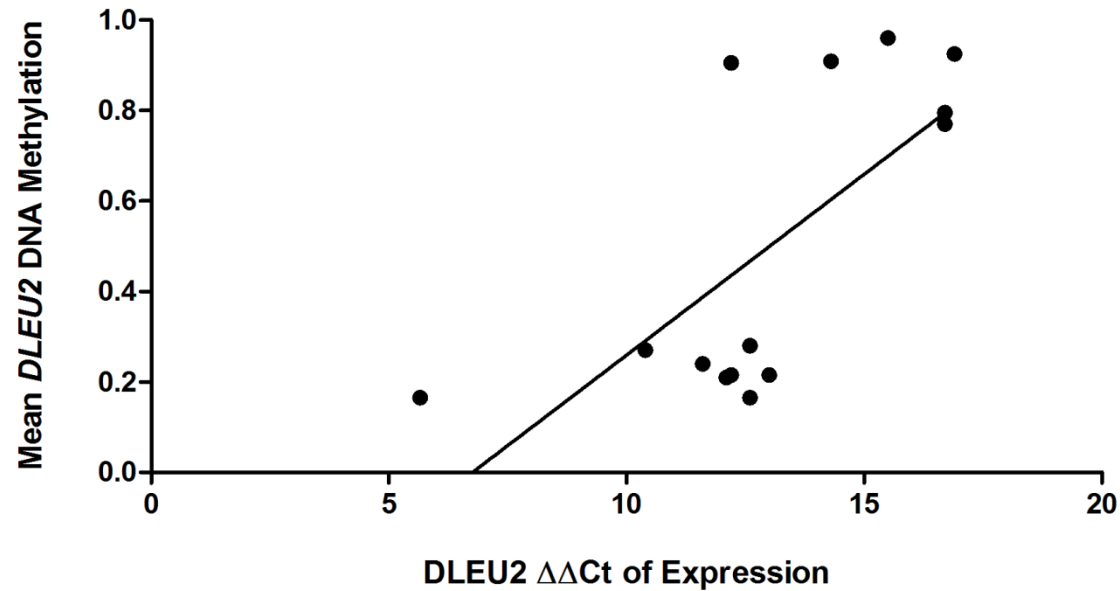

**Additional File 7: Correlation between *DLEU2/Alt1* promoter DNA methylation and *DLEU2* gene expression**

Methylation of the *DLEU2* region under investigation was compared to the *DLEU2* gene expression values obtained after qRT-PCR analysis. The methylation values are represented from 0 (0.0) to 100% (1.0), where the methylation values obtained for all three HM450 probes have been combined. The expression values are shown in normalized  $\Delta\Delta C_t$ . Gene promoter DNA methylation and gene expression are significantly correlated,  $n=14$  matched patient pairs, patient samples only,  $R^2=0.437$ ,  $p=0.0001$
